# Supplementary material for: Inhibitors of both the N-methyl lysyl- and arginyl-demethylase activities of the JmjC oxygenases
Source: PubMed Central journal article supplement (PMC5915715; doi:10.1098/rstb.2017.0071), 2018-04-23
Supplement: rstb20170071supp1.pdf [file rstb20170071supp1.pdf]

Supplementary Material

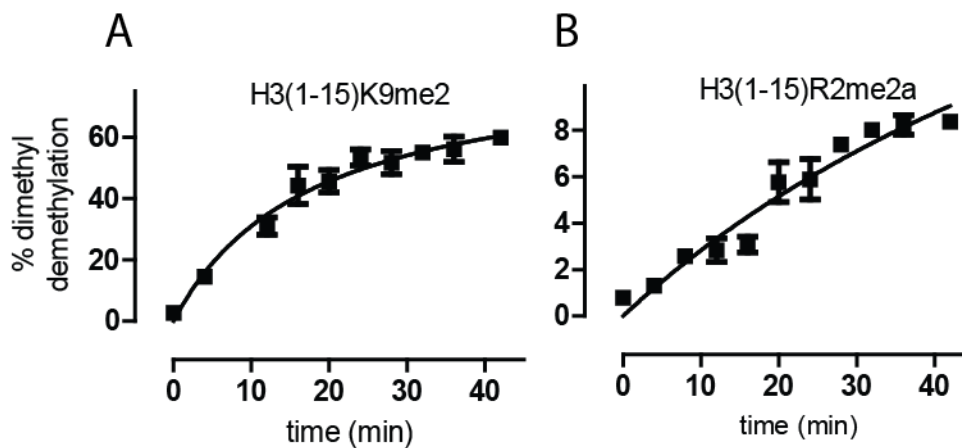

**Figure S1: Time course assays using LC-MS showing the extent of KDM (A) or RDM (B) demethylation.** KDM (A) and RDM (B) activities are represented as percentage of the dimethylated peptide demethylated (average  $\pm$  standard error of the mean (SEM),  $n=2$  analytical repeats). Conditions:  $5\mu\text{M}$  respective peptide,  $10\mu\text{M}$  *Fe(II)*,  $100\mu\text{M}$  sodium *L*-ascorbate,  $10\mu\text{M}$  2OG, 1% DMSO. A:  $0.25\mu\text{M}$  KDM4E, B:  $1\mu\text{M}$  KDM4E. Due to different specific activities for KDM and RDM activities (A: 13 nmoles/min/mg, B: 0.3 nmoles/min/mg), different endpoints were used; A: 15 minutes, B: 25 minutes.

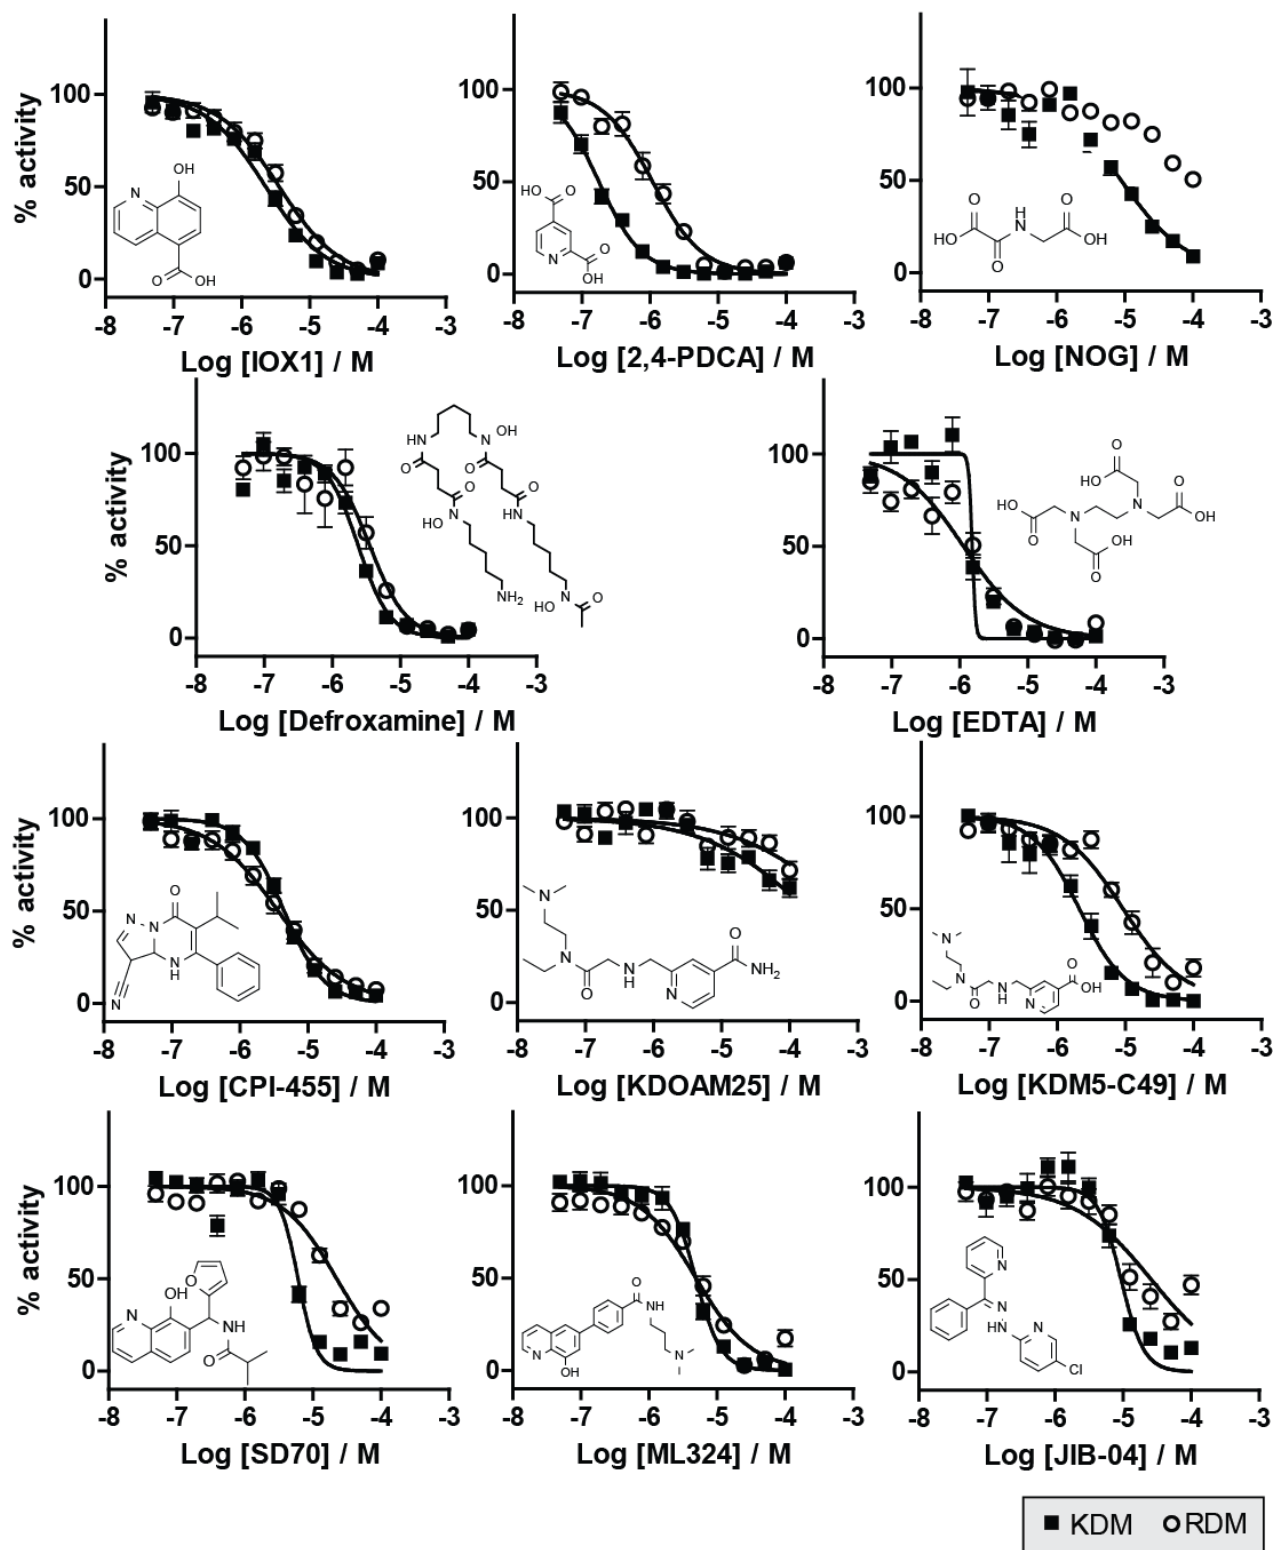

**Figure S2. Comparison of the KDM and RDM activities of KDM4E.** IC<sub>50</sub> determinations were performed using LC-MS (See Materials and Methods). Error bars represent SEM for *n* = 3 assay repeats, each with *n* = 3 with respect to analytical repeats, except for Defroxamine and EDTA which had *n* = 2 assays repeats each with *n* = 3 analytical repeats. Conditions: 5 μM H3(1-15)K9me2/H3(1-15)R2me2a with 0.25 μM/1μM KDM4E, respectively, 10 μM (NH<sub>4</sub>)<sub>2</sub>Fe(SO<sub>4</sub>)<sub>2</sub>, 100 μM sodium L-ascorbate, 10 μM 2OG, with *t* = 15/25 mins, for KDM or RDM activities, respectively). Refer to Table 1 for pIC<sub>50</sub> values.

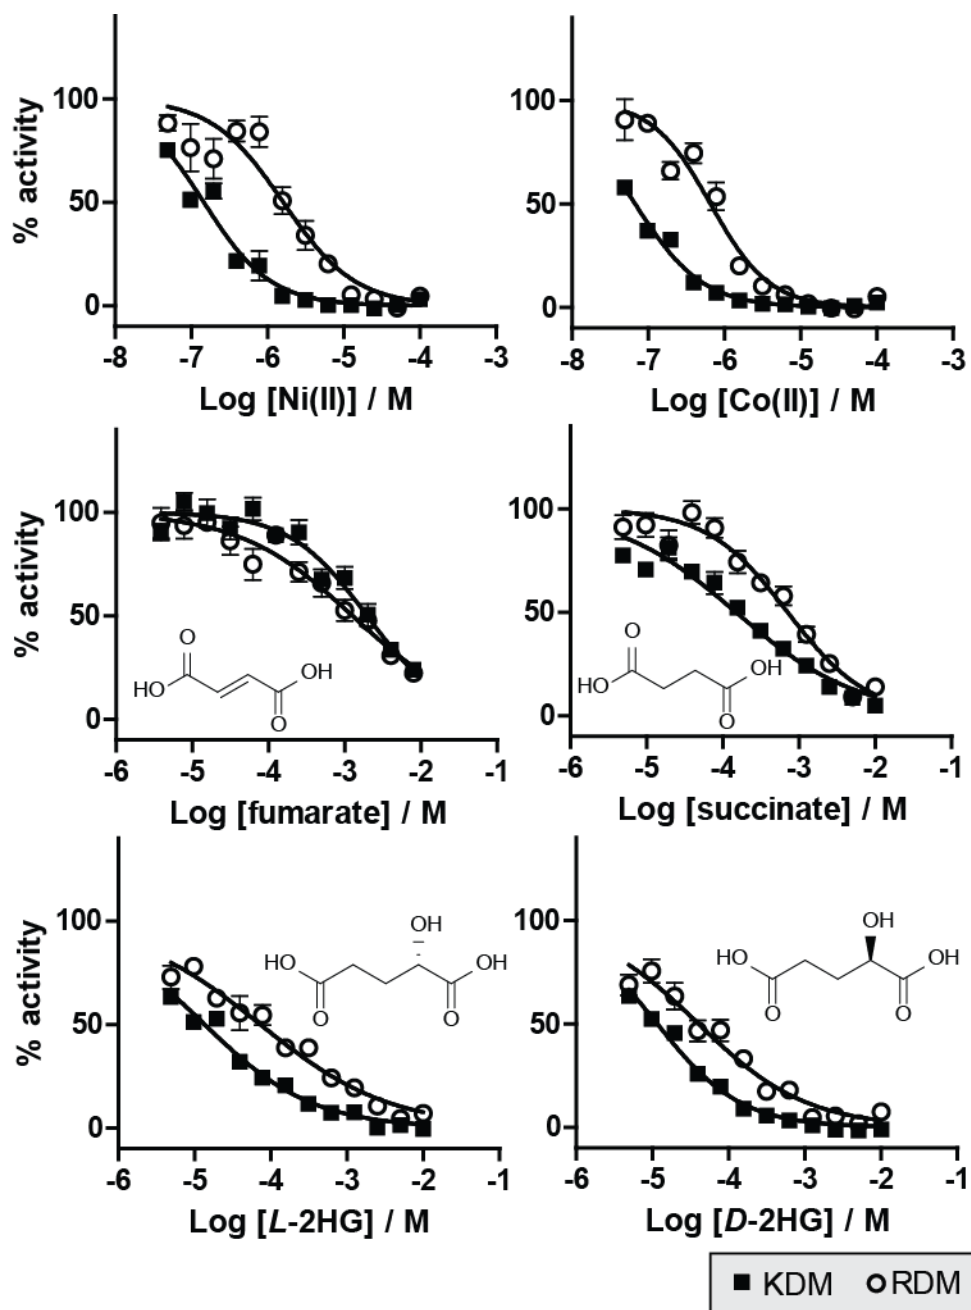

**Figure S2 (cont).** Comparison of the KDM and RDM activities of KDM4E. IC<sub>50</sub> determinations were performed using LC-MS (See Materials and Methods). Error bars represent SEM for n = 2 assay repeats each with n=3 analytical repeats. Conditions: 5 μM H3(1-15)K9me2/H3(1-15)R2me2a with 0.25 μM/1μM KDM4E, respectively, 10 μM (NH<sub>4</sub>)<sub>2</sub>Fe(SO<sub>4</sub>)<sub>2</sub>, 100 μM sodium L-ascorbate, 10 μM 2OG, with t = 15/25 mins, for KDM or RDM activities, respectively). Refer to Table 1 for pIC<sub>50</sub> values.

| Substrate                     | $K_M/\mu\text{M}$ | $k_{\text{cat}} \times 10^{-3} / \text{s}^{-1}$ | $k_{\text{cat}} / K_M \times 10^{-6}$ |
|-------------------------------|-------------------|-------------------------------------------------|---------------------------------------|
| 2OG <sup>(1)</sup>            | 14.0 ± 1.8        | 0.087 ± 0.003                                   | 6.2                                   |
| H3(1-15)K9me3 <sup>(2)</sup>  | 17.8 ± 4.0        | 170.7 ± 15.2                                    | 9,575                                 |
| H3(1-15)K9me2 <sup>(3)</sup>  | 32.3 ± 7.4        | 70.0 ± 4.0                                      | 2167.2                                |
| H3(1-15)R2me2a <sup>(2)</sup> | 86.9 ± 16.5       | 9.9 ± 1.0                                       | 114                                   |
| H4(1-15)R3me2a <sup>(2)</sup> | 121.5 ± 10.1      | 2.1 ± 0.1                                       | 17.7                                  |

**Table S1: Kinetic parameters ( $K_M$ ,  $k_{\text{cat}}$  and  $k_{\text{cat}}/K_M$ ) for substrates and 2OG** performed using the formaldehyde dehydrogenase based coupled assay measuring formaldehyde production as described in (4). Data show mean ± SEM (n = 3).

## References

1. Sakurai M, *et al.* A miniaturized screen for inhibitors of Jumonji histone demethylases. *Mol Biosyst.* 2010;6:357-364.
2. Walport LJ, *et al.* Arginine demethylation is catalysed by a subset of JmjC histone lysine demethylases. *Nat Commun.* 2016;7:11974.
3. Rose NR. Structural, mechanistic and inhibition studies on the histone lysine demethylases: Thesis (D.Phil.)–University of Oxford.; 2009.
4. Rose NR, *et al.* Inhibitor Scaffolds for 2-Oxoglutarate-Dependent Histone Lysine Demethylases. *J Med Chem.* 2008;51:7053-7056.
